# Supplementary material for: Trauma-informed care for children in the ambulance: international survey among pre-hospital providers
Source: PubMed Central journal article supplement (PMC5328382; doi:10.1080/20008198.2016.1273587), 2017-02-08
Supplement: zept_a_1273587_sm0241.pdf [file zept_a_1273587_sm0241.pdf]

Please tell us about yourself:

**1. What is your gender?**

- Female
- Male
- Prefer not to say

**2. What is your age?**

**3. Do you have children under the age of 17?**

- Yes
- No

**4. Are you currently training or working as a paramedic or other emergency health service provider (including graduate paramedic and ambulance driver)?**

- Yes, working as a paramedic
- Yes, working as an emergency medical responder
- Yes, working as an emergency medical technician
- Yes, working as an advanced emergency medical technician
- Yes, training/studying to be a paramedic/emergency medical service provider
- No, I am on leave
- No, I no longer work as a paramedic (this questionnaire is not applicable for you)

**5. How many years of experience do you have working as a paramedic or other emergency health service provider?**

**6. How many of your primary patients are children (0-16 years)?**

- less than 5%
- 5 – 10%
- 10 – 20%
- 20 – 40%
- 40 – 60%
- more than 60%

**7. Is the ambulance service you work for publicly or privately owned?**

- Publicly owned
- Privately owned
- I'm not sure

Other (please specify)

**8. What location do you work in?**

- mostly rural area
- mostly suburban area
- mostly urban/inner city area

Other (please specify)

**9. Which country do you work in?**

**10. Which state, province or region do you work in?**

Based on your experience and knowledge, please answer the following:

Please keep in mind:

For some questions you may choose multiple answers. Please tick - or check - all that apply.

PTS = children's long-term posttraumatic stress reactions, for example nightmares and concentration difficulties a month after the injury.

**11. What severity of injury puts children at risk of Post Traumatic Stress (PTS)? Please tick all that apply:**

- Minor injury (e.g., superficial laceration, dental injury)
- Moderate injury (e.g., closed limb fracture, facial fracture)
- Serious injury (e.g., open limb fracture, hemothorax)
- Severe or critical injury (e.g., ruptured liver, proximal limb amputation)
- I'm not sure

**12. Which age groups are at risk of PTS following an injury? Please tick all that apply:**

- Toddlers (1 to 3 years)
- Young children (4 to 7 years)
- Older children (8 to 12 years)
- Adolescents (13 to 18 years)
- I'm not sure

**13. Who is at risk of PTS following the injury of a child? Please tick all that apply:**

- The injured child
- Parents
- Siblings
- I'm not sure

**14. Children at risk of PTS present as... Please tick all that apply:**

- Frantic and distressed
- Loud
- Calm and compliant
- Quiet / withdrawn
- I'm not sure

**15. Children who, at some point during the trauma, believe that they might die are at higher risk of PTS.**

- Agree
- Agree, but only when that belief is based on a realistic probability of death
- Disagree
- I'm not sure

**16. Injured children who rate their pain as severe...**

- Have the same risk of PTS as other children
- Are at increased risk of PTS
- Are at lower risk of PTS
- I'm not sure

**17. What percentage of injured children and families report traumatic stress reactions within the first month after the injury?**

- less than 25%
- 25% - 50%
- more than 50%
- I'm not sure

**18. How confident are you as a provider that you can...**

|                                                                                        | Not at all            | A little              | Moderately            | Very                  | This is not part of my job |
|----------------------------------------------------------------------------------------|-----------------------|-----------------------|-----------------------|-----------------------|----------------------------|
| Respond calmly and without judgment to a child's or family's strong emotional distress | <input type="radio"/> | <input type="radio"/> | <input type="radio"/> | <input type="radio"/> | <input type="radio"/>      |
| Talk with children in age appropriate language                                         | <input type="radio"/> | <input type="radio"/> | <input type="radio"/> | <input type="radio"/> | <input type="radio"/>      |
| Tailor your approach according to a family's cultural background                       | <input type="radio"/> | <input type="radio"/> | <input type="radio"/> | <input type="radio"/> | <input type="radio"/>      |
| Assess and manage pain in children                                                     | <input type="radio"/> | <input type="radio"/> | <input type="radio"/> | <input type="radio"/> | <input type="radio"/>      |
| Explain procedures to children and parents                                             | <input type="radio"/> | <input type="radio"/> | <input type="radio"/> | <input type="radio"/> | <input type="radio"/>      |
| Inform a child about an injured / deceased family member                               | <input type="radio"/> | <input type="radio"/> | <input type="radio"/> | <input type="radio"/> | <input type="radio"/>      |

### 19. How confident are you as a provider that you can...

|                                                                                                      | Not at all            | A little              | Moderately            | Very                  | This is not part of my job |
|------------------------------------------------------------------------------------------------------|-----------------------|-----------------------|-----------------------|-----------------------|----------------------------|
| Help a child / parent who is anxious to calm down by teaching relaxation (e.g. breathing) techniques | <input type="radio"/> | <input type="radio"/> | <input type="radio"/> | <input type="radio"/> | <input type="radio"/>      |
| Assess a child's or family's distress, emotional needs, and support systems                          | <input type="radio"/> | <input type="radio"/> | <input type="radio"/> | <input type="radio"/> | <input type="radio"/>      |
| Elicit trauma details from a child or family without them being exposed to more distress             | <input type="radio"/> | <input type="radio"/> | <input type="radio"/> | <input type="radio"/> | <input type="radio"/>      |
| Respond to a child's (or parent's) question about whether the child will die                         | <input type="radio"/> | <input type="radio"/> | <input type="radio"/> | <input type="radio"/> | <input type="radio"/>      |
| Liaise with staff who can provide practical assistance to a family (e.g. Social Work)                | <input type="radio"/> | <input type="radio"/> | <input type="radio"/> | <input type="radio"/> | <input type="radio"/>      |
| Take action to get someone close (a parent, family member or friend) available to the child          | <input type="radio"/> | <input type="radio"/> | <input type="radio"/> | <input type="radio"/> | <input type="radio"/>      |

### 20. How confident are you as a provider that you can...

|                                                                                                                                        | Not at all            | A little              | Moderately            | Very                  | This is not part of my job |
|----------------------------------------------------------------------------------------------------------------------------------------|-----------------------|-----------------------|-----------------------|-----------------------|----------------------------|
| Encourage parents to make use of their own social support system (family, friends, spiritual community, etc.)                          | <input type="radio"/> | <input type="radio"/> | <input type="radio"/> | <input type="radio"/> | <input type="radio"/>      |
| Educate children and families about common traumatic stress reactions                                                                  | <input type="radio"/> | <input type="radio"/> | <input type="radio"/> | <input type="radio"/> | <input type="radio"/>      |
| Teach parents or children specific ways to cope with procedures                                                                        | <input type="radio"/> | <input type="radio"/> | <input type="radio"/> | <input type="radio"/> | <input type="radio"/>      |
| Provide information to parents about emotional or behavioural reactions that indicate that the child may need help (when back at home) | <input type="radio"/> | <input type="radio"/> | <input type="radio"/> | <input type="radio"/> | <input type="radio"/>      |
| Educate parents or children about how to access mental health services if needed                                                       | <input type="radio"/> | <input type="radio"/> | <input type="radio"/> | <input type="radio"/> | <input type="radio"/>      |
| Manage your own emotional responses to children's pain and trauma                                                                      | <input type="radio"/> | <input type="radio"/> | <input type="radio"/> | <input type="radio"/> | <input type="radio"/>      |

The term 'psychosocial care' refers to the various actions described in the questions above.

**21. Please indicate whether any of the following are barriers for you in providing psychosocial care**

|                                                                          | Not a barrier         | Somewhat a barrier    | Significant barrier   |
|--------------------------------------------------------------------------|-----------------------|-----------------------|-----------------------|
| Time constraints                                                         | <input type="radio"/> | <input type="radio"/> | <input type="radio"/> |
| Lack of training                                                         | <input type="radio"/> | <input type="radio"/> | <input type="radio"/> |
| Confusing evidence on what to do                                         | <input type="radio"/> | <input type="radio"/> | <input type="radio"/> |
| Worry about further upsetting children and families                      | <input type="radio"/> | <input type="radio"/> | <input type="radio"/> |
| Lack of a dedicated space to provide psychosocial care                   | <input type="radio"/> | <input type="radio"/> | <input type="radio"/> |
| Lack of support from supervisors / others in the system that you work in | <input type="radio"/> | <input type="radio"/> | <input type="radio"/> |

**22. Are there any other barriers for you in providing psychosocial care? Please explain**

**23. How important is it that paramedics or other emergency health service providers help children and families cope with traumatic stress reactions (e.g. by providing psychosocial care) in your view?**

- Not important
- Somewhat important
- Very important

Other (please specify)

**24. Please rate the performance of your workplace as a whole on each of the following:**

|                                                                                   | Poor                  | Fair                  | Good                  | Excellent             | This is not part of our job |
|-----------------------------------------------------------------------------------|-----------------------|-----------------------|-----------------------|-----------------------|-----------------------------|
| Providing psychosocial care to injured children and their families                | <input type="radio"/> | <input type="radio"/> | <input type="radio"/> | <input type="radio"/> | <input type="radio"/>       |
| Helping staff manage their own emotional responses to patients' pain and trauma   | <input type="radio"/> | <input type="radio"/> | <input type="radio"/> | <input type="radio"/> | <input type="radio"/>       |
| Using scientific evidence as a basis for psychosocial care for patients and staff | <input type="radio"/> | <input type="radio"/> | <input type="radio"/> | <input type="radio"/> | <input type="radio"/>       |

**25. What is the performance of your workplace as a whole on the following aspects of psychosocial care for injured children and their families?**

|                                                                                                                               | Poor                  | Fair                  | Good                  | Excellent             | This is not part of our job |
|-------------------------------------------------------------------------------------------------------------------------------|-----------------------|-----------------------|-----------------------|-----------------------|-----------------------------|
| 1. <b>Contact and engagement</b> (responding to or initiating contacts in a non-intrusive, compassionate, and helpful manner) | <input type="radio"/> | <input type="radio"/> | <input type="radio"/> | <input type="radio"/> | <input type="radio"/>       |
| 2. <b>Safety and comfort</b> (enhancing immediate and ongoing safety, and provide physical and emotional comfort)             | <input type="radio"/> | <input type="radio"/> | <input type="radio"/> | <input type="radio"/> | <input type="radio"/>       |
| 3. <b>Stabilization</b> (calming and orienting emotionally overwhelmed/distraught children/families)                          | <input type="radio"/> | <input type="radio"/> | <input type="radio"/> | <input type="radio"/> | <input type="radio"/>       |
| 4. <b>Information gathering on current needs &amp; concerns</b>                                                               | <input type="radio"/> | <input type="radio"/> | <input type="radio"/> | <input type="radio"/> | <input type="radio"/>       |
| 5. <b>Practical assistance</b> (offering practical help to children/families in addressing immediate needs and concerns)      | <input type="radio"/> | <input type="radio"/> | <input type="radio"/> | <input type="radio"/> | <input type="radio"/>       |
| 6. <b>Connecting children/families with social supports</b>                                                                   | <input type="radio"/> | <input type="radio"/> | <input type="radio"/> | <input type="radio"/> | <input type="radio"/>       |
| 7. <b>Giving information on coping</b>                                                                                        | <input type="radio"/> | <input type="radio"/> | <input type="radio"/> | <input type="radio"/> | <input type="radio"/>       |
| 8. <b>Linking children/families with collaborative services</b>                                                               | <input type="radio"/> | <input type="radio"/> | <input type="radio"/> | <input type="radio"/> | <input type="radio"/>       |

The following questions relate to psychological support for paramedics or other emergency health service providers in your workplace.

**26. Are there trained peer-support officers in your ambulance service?**

- Yes
- No
- I don't know

**27. Have you received any professional support following a critical incident (e.g. through a peer-support program)?**

- Yes
- No

**28. If you answered yes to question 27, for approximately how many incidents have you received support?**

- 1 – 3
- 4 – 7
- More than 7

### 29. If you answered yes to question 27, how helpful was the support you received?

- Not helpful
- Somewhat helpful
- Very helpful

### 30. To what extent are these statements true in your workplace?

|                                                                                                                 | Strongly disagree     | Disagree              | Agree                 | Strongly agree        |
|-----------------------------------------------------------------------------------------------------------------|-----------------------|-----------------------|-----------------------|-----------------------|
| People I work with are competent in doing their jobs                                                            | <input type="radio"/> | <input type="radio"/> | <input type="radio"/> | <input type="radio"/> |
| People I work with take a personal interest in my wellbeing in the face of traumatic incidents at work          | <input type="radio"/> | <input type="radio"/> | <input type="radio"/> | <input type="radio"/> |
| People I work with are friendly                                                                                 | <input type="radio"/> | <input type="radio"/> | <input type="radio"/> | <input type="radio"/> |
| People I work with are helpful in supporting colleagues after a distressing incident                            | <input type="radio"/> | <input type="radio"/> | <input type="radio"/> | <input type="radio"/> |
| Management is concerned about the wellbeing of those under them in the face of traumatic incidents at work      | <input type="radio"/> | <input type="radio"/> | <input type="radio"/> | <input type="radio"/> |
| Management pays attention to what you are saying with regard to staff wellbeing                                 | <input type="radio"/> | <input type="radio"/> | <input type="radio"/> | <input type="radio"/> |
| Management is helpful in supporting staff after a distressing incident                                          | <input type="radio"/> | <input type="radio"/> | <input type="radio"/> | <input type="radio"/> |
| Management is successful in getting people to work together                                                     | <input type="radio"/> | <input type="radio"/> | <input type="radio"/> | <input type="radio"/> |
| The ambulance organisation is helpful in supporting staff after a distressing incident                          | <input type="radio"/> | <input type="radio"/> | <input type="radio"/> | <input type="radio"/> |
| The ambulance organisation is concerned about the wellbeing of staff in the face of traumatic incidents at work | <input type="radio"/> | <input type="radio"/> | <input type="radio"/> | <input type="radio"/> |
| I have enough time to recover from distressing incidents at work.                                               | <input type="radio"/> | <input type="radio"/> | <input type="radio"/> | <input type="radio"/> |



The following questions relate to your general levels of psychological distress and wellbeing.

### 31. During the last 30 days, about how often did you feel...

|                                               | None of the time      | A little of the time  | Some of the time      | Most of the time      | All of the time       |
|-----------------------------------------------|-----------------------|-----------------------|-----------------------|-----------------------|-----------------------|
| Depressed?                                    | <input type="radio"/> | <input type="radio"/> | <input type="radio"/> | <input type="radio"/> | <input type="radio"/> |
| So depressed that nothing could cheer you up? | <input type="radio"/> | <input type="radio"/> | <input type="radio"/> | <input type="radio"/> | <input type="radio"/> |
| Hopeless?                                     | <input type="radio"/> | <input type="radio"/> | <input type="radio"/> | <input type="radio"/> | <input type="radio"/> |
| Restless or fidgety?                          | <input type="radio"/> | <input type="radio"/> | <input type="radio"/> | <input type="radio"/> | <input type="radio"/> |
| So restless that you could not sit still?     | <input type="radio"/> | <input type="radio"/> | <input type="radio"/> | <input type="radio"/> | <input type="radio"/> |

### 32. During the last 30 days, about how often did you feel...

|                                              | None of the time      | A little of the time  | Some of the time      | Most of the time      | All of the time       |
|----------------------------------------------|-----------------------|-----------------------|-----------------------|-----------------------|-----------------------|
| Tired out for no good reason?                | <input type="radio"/> | <input type="radio"/> | <input type="radio"/> | <input type="radio"/> | <input type="radio"/> |
| That everything was an effort?               | <input type="radio"/> | <input type="radio"/> | <input type="radio"/> | <input type="radio"/> | <input type="radio"/> |
| Worthless?                                   | <input type="radio"/> | <input type="radio"/> | <input type="radio"/> | <input type="radio"/> | <input type="radio"/> |
| Nervous?                                     | <input type="radio"/> | <input type="radio"/> | <input type="radio"/> | <input type="radio"/> | <input type="radio"/> |
| So nervous that nothing could calm you down? | <input type="radio"/> | <input type="radio"/> | <input type="radio"/> | <input type="radio"/> | <input type="radio"/> |

The following questions are related to training in psychosocial care.

### 33. Would you like to gain more knowledge and skills regarding psychosocial care for injured children?

- Yes
- No, my knowledge and skills are sufficient
- No, I feel it is not relevant
- No, because

**34. If you have answered yes to question 33, which training format would you prefer?**

**Please indicate your 1st and 2nd choice**

|                                                                               | 1st preference        | 2nd preference        |
|-------------------------------------------------------------------------------|-----------------------|-----------------------|
| A book on the topic                                                           | <input type="radio"/> | <input type="radio"/> |
| Online: website with written information                                      | <input type="radio"/> | <input type="radio"/> |
| Online: interactive website (e.g., 'webinar', video examples, quizzes)        | <input type="radio"/> | <input type="radio"/> |
| Individual mentor sessions with an experienced clinician of my own profession | <input type="radio"/> | <input type="radio"/> |
| Individual mentor sessions with a mental health clinician                     | <input type="radio"/> | <input type="radio"/> |
| Group training in-person in one block of hours                                | <input type="radio"/> | <input type="radio"/> |
| Group training in-person spread over a number of weeks                        | <input type="radio"/> | <input type="radio"/> |

Other (please specify)

**35. If you have answered yes to question 33, how many hours of training would you be able to commit to (in the next 6 months)?**

- 1 – 4 hrs
- 5 – 8 hrs
- > 8 hrs

**36. Have you had specific training in psychosocial care for injured children?**

- No
- Yes

**37. If you have answered yes to question 36, how many hours of training did you have?**

- 1 – 4 hrs
- 5 – 8 hrs
- > 8 hrs

**38. If you have answered yes to question 36, how long ago was the training?**

- within the past year
- 1 to 5 years ago
- 5 to 10 years ago
- more than 10 years ago

**39. If you have answered yes to question 36, what was the model/method used?**

- MANERS
- Psychological First Aid
- Medical Traumatic Stress Toolkit
- Critical Incident Stress Debriefing
- Other - I don't know the name any more
- Other - the model/method was:

**40. We involve paramedics and other emergency health service providers from as many countries as possible. Are there any cultural considerations/issues that you would like to make us aware of? Please share them here:**

**41. If you have any additional comments on working with injured children and families, please share them here:**

**Many thanks for your participation.**

**Thank you!**
